# Supplementary material
Source: PubMed Central journal article supplement (PMC3107565)
Supplement: supp_djq494_jnci-JNCI-10-0611-s01.pdf [file supp_djq494_jnci-JNCI-10-0611-s01.pdf]

**Supplementary Table 1. *BRCA1* and *BRCA2* mutation carriers divided by study and genotyping method**

| Study                                                                                       | Country                | No. of mutation carriers |              |       | Method of genotyping |
|---------------------------------------------------------------------------------------------|------------------------|--------------------------|--------------|-------|----------------------|
|                                                                                             |                        | <i>BRCA1</i>             | <i>BRCA2</i> | Total |                      |
| Breast Cancer Family Registry (BCFR)                                                        | USA, Canada, Australia | 498                      | 357          | 855   | Taqman               |
| Baltic Familial Breast and Ovarian Cancer Consortium (BFBOCC)                               | Latvia, Lithuania      | 94                       | 0            | 94    | Taqman               |
| Copenhagen Breast Cancer Study (CBCS)                                                       | Denmark                | 191                      | 97           | 288   | Taqman               |
| Spanish National Cancer Centre (CNIO)                                                       | Spain, Greece          | 196                      | 245          | 441   | Taqman               |
| CONsorzio Studi ITaliani sui Tumori Ereditari Alla Mammella (CONSIT TEAM)                   | Italy                  | 732                      | 463          | 1,195 | Taqman               |
| Deutsches Krebsforschungszentrum (DKFZ)                                                     | Germany                | 69                       | 27           | 96    | Taqman               |
| HEreditary Breast and Ovarian study Netherlands (DNA HEBON)                                 | The Netherlands        | 773                      | 287          | 1,060 | iPLEX                |
| Epidemiological study of <i>BRCA1</i> and <i>BRCA2</i> mutation carriers (EMBRACE)          | UK and EIRE            | 985                      | 828          | 1,813 | iPLEX                |
| Fox Chase Cancer Center (FCCC)                                                              | USA                    | 80                       | 53           | 133   | iPLEX                |
| German Consortium of Hereditary Breast and Ovarian Cancer (GC-HBOC)                         | Germany                | 747                      | 373          | 1,120 | Taqman               |
| Genetic Modifiers of cancer risk in <i>BRCA1/2</i> mutation carriers (GEMO)                 | France, USA            | 1,104                    | 563          | 1,667 | Taqman               |
| Hospital Clinico San Carlos (HCSC)                                                          | Spain                  | 122                      | 108          | 230   | Taqman               |
| Helsinki Breast Cancer Study (HEBCS)                                                        | Finland                | 97                       | 100          | 197   | iPLEX                |
| Institut Català d'Oncologia (ICO)                                                           | Spain                  | 110                      | 120          | 230   | Taqman               |
| International Hereditary Cancer Centre (IHCC)                                               | Poland                 | 781                      | 0            | 781   | Taqman               |
| Iceland Landspítali - University Hospital (ILUH)                                            | Iceland                | 0                        | 127          | 127   | iPLEX                |
| Interdisciplinary Health Research International Team Breast Cancer Susceptibility (INHERIT) | Quebec, Canada         | 73                       | 82           | 155   | Taqman               |
| Istituto Oncologico Veneto Hereditary Breast and Ovarian Cancer Study (IOVHBOCS)            | Italy                  | 119                      | 111          | 230   | Taqman               |
| Kathleen Cuningham Foundation Consortium for Research into Familial Breast Cancer (KCONFAB) | Australia              | 572                      | 467          | 1,039 | iPLEX                |
| Mayo Clinic (MAYO)                                                                          | USA                    | 223                      | 122          | 345   | iPLEX                |
| Memorial Sloane Kettering Cancer Center (MSKCC)                                             | USA                    | 290                      | 235          | 525   | Taqman               |
| National Cancer Institute (NCI)                                                             | USA                    | 159                      | 74           | 233   | Taqman               |
| N.N. Petrov Institute of Oncology (NNPIO)                                                   | Russia                 | 86                       | 0            | 86    | Taqman               |
| Ontario Cancer Genetics Network (OCGN)                                                      | Canada                 | 218                      | 169          | 387   | Taqman               |
| Odense University Hospital (OUH)                                                            | Denmark                | 265                      | 194          | 459   | Taqman               |
| Pisa Breast Cancer Study (PBCS)                                                             | Italy                  | 86                       | 56           | 142   | iPLEX                |
| Swedish Breast Cancer Study (SWE-BRCA)                                                      | Sweden                 | 499                      | 171          | 670   | iPLEX                |
| University of California Irvine (UCI)                                                       | USA                    | 168                      | 120          | 288   | Taqman               |

|                                                                   |         |               |              |               |        |
|-------------------------------------------------------------------|---------|---------------|--------------|---------------|--------|
| University of California San Francisco (UCSF)                     | USA     | 46            | 29           | 75            | Taqman |
| UK and Gilda Radner Familial Ovarian Cancer Registries (UKGRFOCR) | UK, USA | 169           | 35           | 204           | Taqman |
| University of Pennsylvania (UPENN)                                | USA     | 307           | 148          | 455           | iPLEX  |
| Women's Cancer Research Institute (WCRI)                          | USA     | 170           | 76           | 246           | Taqman |
| <b>Total</b>                                                      |         | <b>10,029</b> | <b>5,837</b> | <b>15,866</b> |        |

---
