# Supplementary material
Source: PubMed Central journal article supplement (PMC3107565)
Supplement: supp_djq494_jnci-JNCI-10-0611-s02.pdf [file supp_djq494_jnci-JNCI-10-0611-s02.pdf]

**Supplementary Table 2. Ethics approval committees**

| Study                                                                                       | Committee name                                                                                                                                                                                                                                           |
|---------------------------------------------------------------------------------------------|----------------------------------------------------------------------------------------------------------------------------------------------------------------------------------------------------------------------------------------------------------|
| Breast Cancer Family Registry (BCFR)                                                        | Institutional Review Board University of Utah<br>The University of Melbourne Health Sciences Human Ethics Sub-Committee<br>Columbia University Medical Center Institutional Review Board<br>Northern California Cancer Center Institutional Review Board |
| Baltic Familial Breast and Ovarian Cancer Consortium (BFBOCC)                               | Centrālā medicīnas ētikas Komiteja                                                                                                                                                                                                                       |
| Copenhagen Breast Cancer Study (CBCS)                                                       | De Videnskabetiske Komiteer i Region Hovedsladen                                                                                                                                                                                                         |
| Spanish National Cancer Centre (CNIO)                                                       | Instituto de Salud Carlos III Comité de Bioética y Bienestar Animal                                                                                                                                                                                      |
| CONsorzio Studi ITaliani sui Tumori Ereditari Alla Mammella (CONSIT TEAM)                   | Comitato Etico Indipendente della Fondazione IRCCS "Istituto Nazionale dei Tumori"<br>Ethik-Kommission des Klinikums der Universität                                                                                                                     |
| Deutsches Krebsforschungszentrum (DKFZ)                                                     | Hospital Universitario de San Ignacio Comité de Investigaciones y Etica<br>Shaukat Khanum Memorial Cancer Hospital and Research Centre Institutional Review Board                                                                                        |
| HEreditary Breast and Ovarian study Netherlands (DNA HEBON)                                 | Protocol Toetsingscommissie van het Nederlands Kanker Instituut/Antoni van Leeuwenhoek Ziekenhuis                                                                                                                                                        |
| Epidemiological study of BRCA1 and BRCA2 mutation carriers (EMBRACE)                        | Anglia & Oxford Multicentre Research Ethics Committee                                                                                                                                                                                                    |
| Fox Chase Cancer Center (FCCC)                                                              | Institutional Review Board Fox Chase Cancer Center                                                                                                                                                                                                       |
| German Consortium of Hereditary Breast and Ovarian Cancer (GC-HBOC)                         | Ethik-Kommission der Medizinischen Fakultät der Universität zu Köln<br>Comité consultatif sur le traitement de l'information en matière de recherche dans le domaine de la santé                                                                         |
| Genetic Modifiers of cancer risk in <i>BRCA1/2</i> mutation carriers (GEMO)                 | Comité Ético de Investigación Clínica Hospital Clínico San Carlos                                                                                                                                                                                        |
| Hospital Clinico San Carlos (HCSC)                                                          | Helsingin ja uudenmaan sairaanhoitopiiri (Helsinki University Central Hospital ethics committee)                                                                                                                                                         |
| Helsinki Breast Cancer Study (HEBCS)                                                        | Catalan Institute of Oncology Institutional Review Board                                                                                                                                                                                                 |
| Institut Català d'Oncologia (ICO)                                                           | Skład Komisji Bioetycznej Pomorskiej Akademii Medycznej                                                                                                                                                                                                  |
| International Hereditary Cancer Centre (IHCC)                                               | Visindasidanefnd National Bioethics Committee                                                                                                                                                                                                            |
| Iceland Landspítali - University Hospital (ILUH)                                            | Comité d'éthique de la recherche du Centre Hospitalier Universitaire de Québec                                                                                                                                                                           |
| Interdisciplinary Health Research International Team Breast Cancer Susceptibility (INHERIT) | Centro Oncologico Regionale Azienda Ospedale Di Padova Comitato Etico                                                                                                                                                                                    |
| Istituto Oncologico Veneto Hereditary Breast and Ovarian Cancer Study                       |                                                                                                                                                                                                                                                          |

(IOVHBOCS)

Kathleen Cuninghams Foundation Consortium for Research into Familial Breast Cancer (KCONFAB)

Mayo Clinic (MAYO)

Memorial Sloan Kettering Cancer Center (MSKCC)

National Cancer Institute (NCI)

N.N. Petrov Institute of Oncology (NNPIO)

Ontario Cancer Genetics Network (OCGN)

Odense University Hospital (OUH)

Pisa Breast Cancer Study (PBCS)

Swedish Breast Cancer Study (SWE-BRCA)

University of California Irvine (UCI)

University of California San Francisco (UCSF)

UK and Gilda Radner Familial Ovarian Cancer Registries (UKGRFOCR)

University of Pennsylvania (UPENN)

Women's Cancer Research Institute (WCRI)

Peter MacCallum Cancer Centre Ethics Committee

Queensland Institute of Medical Research - Human Research Ethics Committee

Mayo Clinic Institutional Review Boards

Memorial Sloan-Kettering Cancer Center IRB

Human Biospecimen Utilization Committee

NIH Ethics Office

N.N. Petrov Institutional Ethical Committee

University Health Network Research Ethics Board

Mount Sinai Hospital Research Ethics Board

Den Videnskabetiske Komité for Region Syddanmark

Azienda Ospedaliera Pisana Ethical Committee

Regionala Etikprövningsnämnden Stockholm

UC Irvine: Office of Research Administration Institutional Review Board

Committee on Human Research

Cambridge Local Research Ethics Committee

Roswell Park Cancer Institute IRB

University of Pennsylvania Institutional Review Board

Cedars-Sinai Institutional Review Board

---
