# Supplementary material
Source: PubMed Central journal article supplement (PMC3107565)
Supplement: supp_djq494_jnci-JNCI-10-0611-s03.pdf [file supp_djq494_jnci-JNCI-10-0611-s03.pdf]

**Supplementary Table 3.** Genotype distribution of rs3814113 by affection status for ovarian cancer and associations with ovarian cancer risk after a first breast cancer diagnosis\*

| Gene(s)                 | rs3814113 genotype  | Unaffected No. (%) | Affected No. (%) | HR (95% CI)            | P†                     |
|-------------------------|---------------------|--------------------|------------------|------------------------|------------------------|
| <i>BRCA1</i>            | TT                  | 3526 (43.3)        | 251 (47.9)       | 1 (ref)                |                        |
|                         | CT                  | 3671 (45.1)        | 220 (42.0)       | 0.81<br>(0.68 to 0.98) |                        |
|                         | CC                  | 945 (11.6)         | 53 (10.1)        | 0.68<br>(0.51 to 0.92) |                        |
|                         | 2-df test           |                    |                  |                        | 1.1 x 10 <sup>-2</sup> |
|                         | Per-allele analysis |                    |                  | 0.82<br>(0.72 to 0.93) | 2.9 x 10 <sup>-3</sup> |
| <i>BRCA2</i>            | TT                  | 2436 (45.8)        | 78 (54.2)        | 1 (ref)                |                        |
|                         | CT                  | 2288 (43.1)        | 57 (39.6)        | 0.72<br>(0.50 to 1.02) |                        |
|                         | CC                  | 590 (11.1)         | 9 (6.2)          | 0.44<br>(0.22 to 0.88) |                        |
|                         | 2-df test           |                    |                  |                        | .026                   |
|                         | Per-allele analysis |                    |                  | 0.69<br>(0.53 to 0.90) | .0059                  |
| <i>BRCA1/2</i> combined | Per-allele analysis |                    |                  | 0.79<br>(0.70 to 0.88) | 5.4 x 10 <sup>-5</sup> |

\*HR = hazard ratio; CI = confidence interval; ref = referent.

† A robust Wald test statistic was used. All statistical tests were two-sided.
