# Supplementary material
Source: PubMed Central journal article supplement (PMC3107565)
Supplement: supp_djq494_jnci-JNCI-10-0611-s04.pdf [file supp_djq494_jnci-JNCI-10-0611-s04.pdf]

**Supplementary Table 4.** Genotype distribution of rs3814113 by affection status for ovarian cancer and associations with ovarian cancer risk after excluding subjects with prevalent ovarian cancer\*

| Gene         | rs3814113 genotype  | Unaffected No. (%) | Affected No. (%) | HR (95% CI)            | P†                     |
|--------------|---------------------|--------------------|------------------|------------------------|------------------------|
| <i>BRCA1</i> | TT                  | 3193 (43.5)        | 638 (50.6)       | 1(ref)                 |                        |
|              | CT                  | 3323 (45.2)        | 518 (41.1)       | 0.80<br>(0.70 to 0.91) |                        |
|              | CC                  | 828 (11.3)         | 104 (8.3)        | 0.59<br>(0.47 to 0.75) |                        |
|              | 2-df test           |                    |                  |                        | 4.4 x 10 <sup>-6</sup> |
|              | Per-allele analysis |                    |                  | 0.78<br>(0.71 to 0.86) | 6.0 x 10 <sup>-7</sup> |
| <i>BRCA2</i> | TT                  | 2335 (45.7)        | 191 (51.5)       | 1 (ref)                |                        |
|              | CT                  | 2201 (43.1)        | 150 (40.4)       | 0.81<br>(0.64 to 1.02) |                        |
|              | CC                  | 569 (11.2)         | 30 (8.1)         | 0.63<br>(0.42 to 0.93) |                        |
|              | 2-df test           |                    |                  |                        | .031                   |
|              | Per-allele analysis |                    |                  | 0.80<br>(0.68 to 0.94) | .008                   |

\* No censoring at breast cancer diagnosis was used in this analysis. HR = hazard ratio; CI = confidence interval; ref = referent.

† A robust Wald test statistic was used. All statistical tests were two-sided.
